# Supplementary material for: iTRAQ proteomics reveals the regulatory response to Magnaporthe oryzae in durable resistant vs. susceptible rice genotypes
Source: PubMed Central journal article supplement (PMC6954073; doi:10.1371/journal.pone.0227470), 2020-01-10

# The original images for Fig. 5

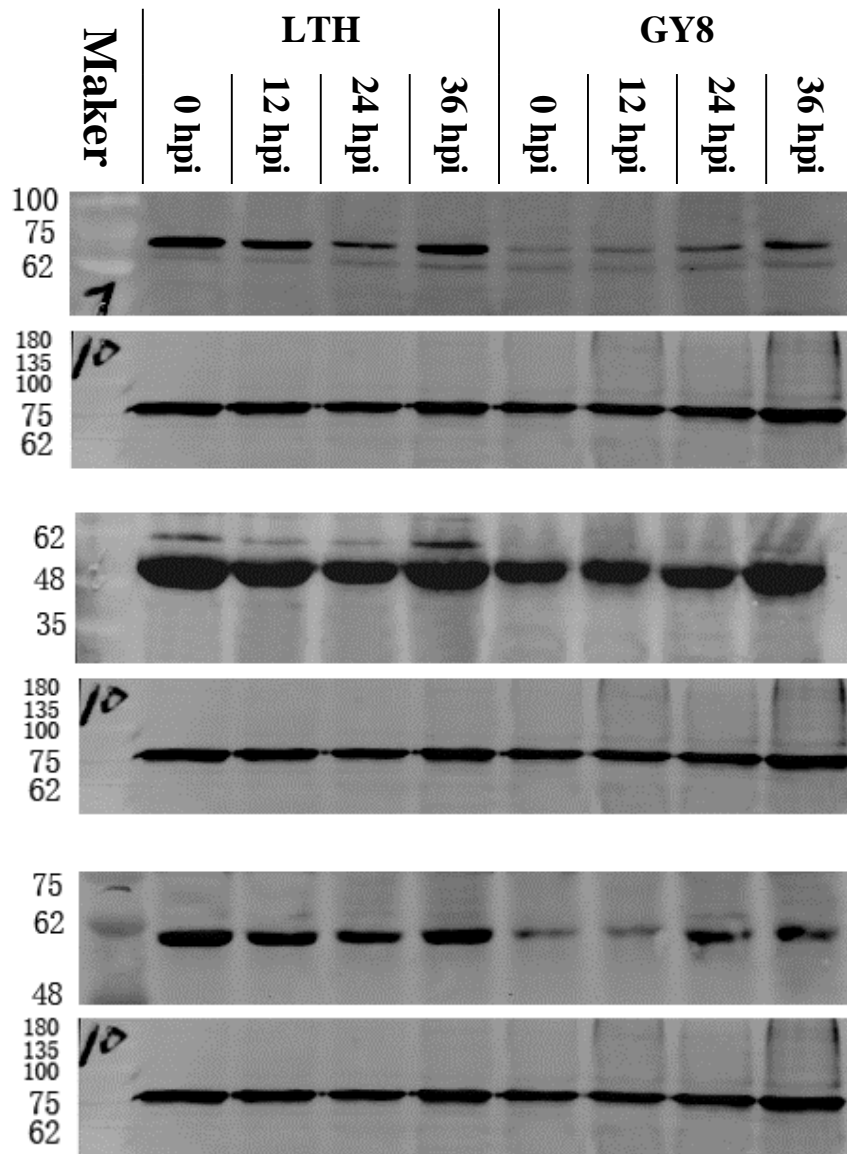

$\beta$ -1,3-glucanase (Os01g0713200)

Bip-2

OsPR10 (Os03g0300400)

Bip-2

$\beta$ -1,3-glucanase10 (Os07g0539900)

Bip-2

# The original images for Fig. 5

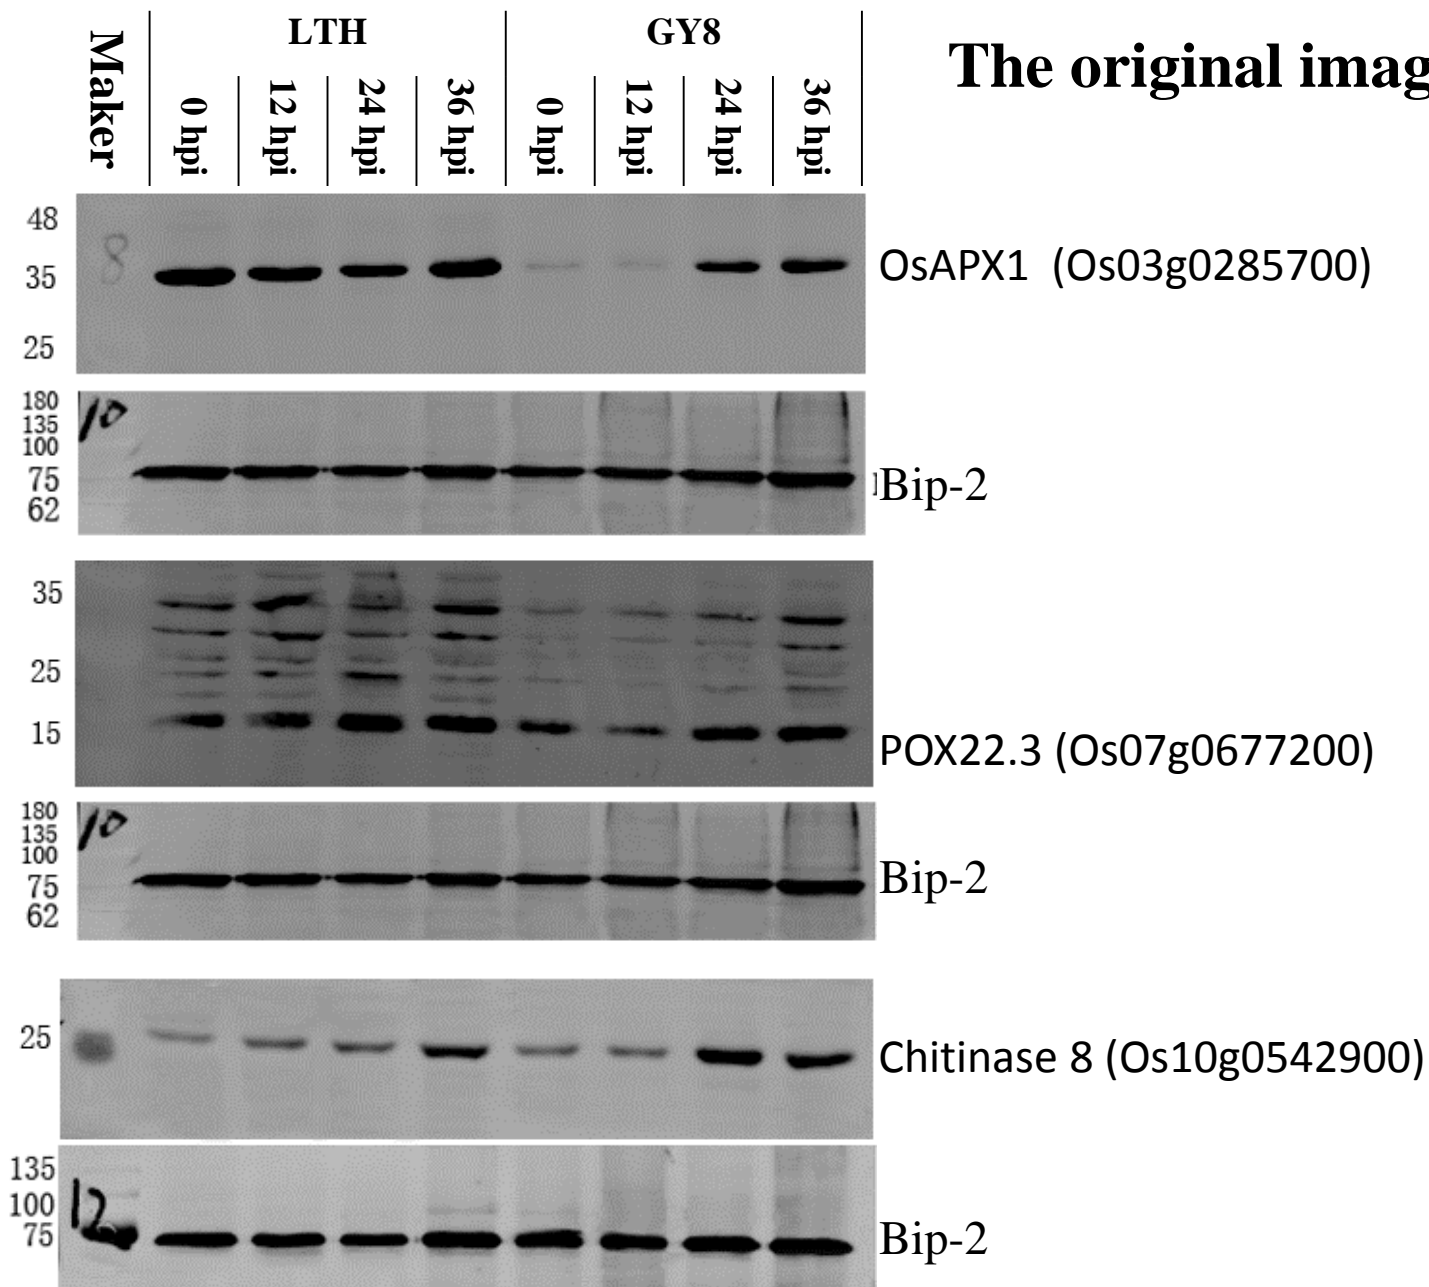

Supplement: pone.0227470.s014.pdf [file pone.0227470.s014.pdf]
